# Supplementary material for: A novel bifunctional thioarsenate based on unprecedented molecular [Cd4As8Se16(Se2)2]8− cluster anions
Source: Royal Society of Chemistry journal article supplement (doi:10.1039/d3cc03538g), 2023-01-01
Supplement: d3cc03538g1.pdf [file d3cc03538g1.pdf]

## *Electronic Supplementary Information (ESI)*

---

# **A novel bifunctional thioarsenate based on unprecedented molecular $[\text{Cd}_4\text{As}_8\text{Se}_{16}(\text{Se}_2)_2]^{8-}$ cluster anions**

Xin Chen,<sup>‡a</sup> Sheng-Hua Zhou,<sup>‡b,c,d</sup> Chao Zhang,<sup>a</sup> Hua Lin,<sup>\*,b,c</sup> and Yi Liu<sup>\*,a</sup>

---

<sup>a</sup>*Institute for Composites Science Innovation (InCSI), School of Materials Science and Engineering, Zhejiang University, Hangzhou 310027, China*

<sup>b</sup>*Fujian Science & Technology Innovation Laboratory for Optoelectronic Information of China, Fuzhou 350108, China*

<sup>c</sup>*State Key Laboratory of Structural Chemistry, Fujian Institute of Research on the Structure of Matter, Chinese Academy of Sciences, Fuzhou 350002, China*

<sup>d</sup>*University of Chinese Academy of Sciences, Beijing 100049, China*

<sup>‡</sup>X. Chen and S. H. Zhou contributed equally to this work

\*E-mail: liuyimse@zju.edu.cn and linhua@fjirsm.ac.cn.

## **Electronic Supplementary Information Index**

### **1. Experimental Section**

1.1 Physical Measurements

1.2 Syntheses of  $\text{Cs}_2\text{CdAsSe}_5$

1.3 Single-Crystal Structure Characterizations

### **2. Computational Details**

### **3. Figures and Tables**

**Figure S1.** Energy-dispersive X-ray spectroscopy analysis of  $\text{Cs}_2\text{CdAsSe}_5$ .

**Table S1.** Crystallographic data and refinement details for  $\text{Cs}_2\text{CdAsSe}_5$ .

**Table S2.** Atomic coordinates and equivalent isotropic displacement parameters of  $\text{Cs}_2\text{CdAsSe}_5$ .

**Table S3.** Selected bond lengths (Å) for  $\text{Cs}_2\text{CdAsSe}_5$ .

**Table S4.** Structural features of selected chalcogenides in the R–M–As<sup>V</sup>–Q (R = charge-balanced cations; M = metal elements; Q = chalcogen) system.

**4. References**

## 1. Experimental Section

**Physical Measurements.** The elemental analyses have been examined with via an EDX-equipped JEOL/JSM-6360A SEM. Powder X-ray diffraction data were collected on a Bruker D8 Advance diffractometer with a graphite-monochromatized Cu  $K_{\alpha}$  radiation. The operating  $2\theta$  angle ranges from  $10^{\circ}$  to  $70^{\circ}$ . Simulation of XRD patterns were carried out by the single-crystal data and diffraction-crystal module of the Mercury (Hg) program version 1.4.2 available free of charge through the website <http://www.iucr.org>. The optical diffuse reflectance spectra were measured on a Hitachi UH4150 UV-vis-NIR spectrometer equipped with an integrating sphere at room temperature. The picked polycrystalline samples were ground into fine powders before measurement. The absorption ( $\alpha/S$ ) data were calculated from reflectance with the Kubelka-Munk function:  $\alpha/S = (1-R)^2/2R$ , in which  $\alpha$  is the absorption coefficient,  $R$  is the reflectance at a specified wavelength, and  $S$  is the scattering coefficient.<sup>1</sup> The photo-electrochemical tests were done under simulated solar light illumination using an electrochemical workstation (CHI660E) with conventional three-electrode setup on open circuit voltage. Each as-prepared powder sample was coated onto a slice of ITO glass with an area of  $0.5 \times 1 \text{ cm}^2$  and employed as the working electrode. A saturated Hg/Hg<sub>2</sub>Cl<sub>2</sub> and a platinum wire were used as the reference and counter electrodes, respectively, and 0.2 M Na<sub>2</sub>SO<sub>4</sub> aqueous solution with 10% lactic acid was used as electrolyte. A 500 W Xe lamp was utilized as the simulated solar light source.

**Syntheses of Cs<sub>2</sub>CdAsSe<sub>5</sub>.** The starting reagents CsOH·H<sub>2</sub>O (99.7%), Cd powder (99.99%) and PEG-400(99.5%) purchased from Sinopharm Chemical

Reagent Co., Ltd. 1,2-Propanediamine (99%), Cd powder (99.99%) and the binary starting material  $\text{As}_2\text{Se}_3$  (99.9%) was purchased from Aladdin Co., Ltd. All the chemicals used for synthesis are of analytical grade and directly used without further purification.

Compound  $\text{Cs}_2\text{CdAsSe}_5$  was obtained by the reaction as follows: 1 mmol of  $\text{CsOH}\cdot\text{H}_2\text{O}$ , 0.6 mmol of Cd, 0.5 mmol of  $\text{As}_2\text{Se}_3$ , 2.5 mmol of Se, 2 mL of PEG-400 and 1 mL of 1,2-Propanediamine. All reactants were sealed in a 25 mL Teflon-lined stainless autoclave which was kept at 453 K for 7 days prior to cooling to room temperature naturally. The resultant reaction mixtures were washed with distilled water and ethanol, respectively. A lot of purple block-shaped  $\text{Cs}_2\text{CdAsSe}_5$  crystals (approximately 70% yield based on Cd) were obtained and pure phase could be easily obtained by manually picking crystals from the mixtures.

**Single-Crystal Structure Characterizations.** Suitable single crystals of the title compounds were mounted on the glass fibers. Diffraction data were collected by an Oxford Xcalibur (Atlas Gemini ultra) diffractometer with a graphite-monochromated Mo- $K_\alpha$  radiation ( $\lambda = 0.71073 \text{ \AA}$ ) at room temperature. The absorption corrections were based on the multi-scan method. The structures were solved by the direct methods and refined by the full-matrix least-squares fitting on  $F^2$  using the *SHELXL-2014* software package.<sup>2</sup> The assignments of atoms were determined on the basis of the interatomic distances, coordination environments and relative displacement parameters. The structure was verified using the *ADDSYM* algorithm from the program *PLATON*.<sup>3</sup> The final atomic positions were standardized with the

*STRUCTURE TIDY* program.<sup>4</sup> Crystal data and refinement details are summarized in Tables 1-2, the selected bond lengths are listed in Table S3. CCDC number: 2215340.

**Computational Details.** Crystallographic data determined by single crystal X-ray diffraction were used for theoretical calculations of their electronic band structures. The density functional theory (DFT) calculations have been performed using the Vienna ab initio simulation package (VASP)<sup>5-7</sup> with the Perdew-Burke-Ernzerhof (PBE)<sup>8</sup> exchange correlation functional. The projected augmented wave (PAW)<sup>9</sup> potentials have been used to treat the ion-electron interactions. A  $\Gamma$ -centered  $5\times 5\times 7$  Monkhorst-Pack grid for the Brillouin zone sampling and a cutoff energy of 700 eV for the plane wave expansion were found to get convergent lattice parameters and self-consistent energies.

Figures and Tables

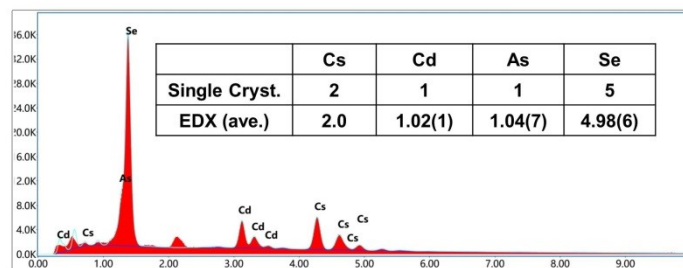

**Figure S1.** Energy-dispersive X-ray spectroscopy analysis of  $\text{Cs}_2\text{CdAsSe}_5$ .

**Table S1.** Crystallographic data and refinement details for  $\text{Cs}_2\text{CdAsSe}_5$ .

| formula                                                                                                                   | $\text{Cs}_2\text{CdAsSe}_5$ |
|---------------------------------------------------------------------------------------------------------------------------|------------------------------|
| fw                                                                                                                        | 847.94                       |
| crystal system                                                                                                            | Tetragonal                   |
| Temperature (K)                                                                                                           | 453                          |
| crystal colour                                                                                                            | purple                       |
| space group                                                                                                               | $P4_2/n$ (no. 85)            |
| $a$ (Å)                                                                                                                   | 17.9368(6)                   |
| $b$ (Å)                                                                                                                   | 17.9368(6)                   |
| $c$ (Å)                                                                                                                   | 7.5125(4)                    |
| $\alpha$ (deg.)                                                                                                           | 90                           |
| $\beta$ (deg.)                                                                                                            | 90                           |
| $\gamma$ (deg.)                                                                                                           | 90                           |
| $V$ (Å <sup>3</sup> )                                                                                                     | 2417.0(2)                    |
| $Z$                                                                                                                       | 8                            |
| $D_c$ (g/cm <sup>3</sup> )                                                                                                | 4.660                        |
| $\mu$ (mm <sup>-1</sup> )                                                                                                 | 25.456                       |
| GOOF on $F^2$                                                                                                             | 1.067                        |
| refines/parameters/restraints                                                                                             | 2119/83/0                    |
| $R_1, wR_2$ ( $I > 2\sigma(I)$ ) <sup>a</sup>                                                                             | 0.0461, 0.1150               |
| $R_1, wR_2$ (all data)                                                                                                    | 0.0481, 0.1160               |
| largest diff. Peak / hole (e/Å <sup>3</sup> )                                                                             | 2.018/-1.323                 |
| <sup>a</sup> $R_1 = \Sigma  F_o  -  F_c   / \Sigma F_o $ , $wR_2 = [\Sigma w(F_o^2 - F_c^2)^2 / \Sigma w(F_o^2)^2]^{1/2}$ |                              |

## *Electronic Supplementary Information (ESI)*

**Table S2.** Atomic coordinates and equivalent isotropic displacement parameters of Cs<sub>2</sub>CdAsSe<sub>5</sub>.

| Atom | Wyckoff | <i>x</i>   | <i>y</i>   | <i>z</i>    | $U_{(eq)}^*$ | Occu. |
|------|---------|------------|------------|-------------|--------------|-------|
| Cs1  | 8g      | 0.65814(7) | 0.13587(7) | 0.2663(2)   | 0.0437(4)    | 1.0   |
| Cs2  | 8g      | 0.39624(5) | 0.07806(5) | 0.23434(12) | 0.0205(2)    | 1.0   |
| Cd   | 8g      | 0.37872(6) | 0.30865(6) | 0.77950(14) | 0.0176(3)    | 1.0   |
| As   | 8g      | 0.34227(8) | 0.51564(8) | 0.7614(2)   | 0.0153(3)    | 1.0   |
| Se1  | 8g      | 0.12187(9) | 0.86336(8) | 0.7203(2)   | 0.0270(4)    | 1.0   |
| Se2  | 8g      | 0.47786(9) | 0.23241(8) | 0.9761(2)   | 0.0206(3)    | 1.0   |
| Se3  | 8g      | 0.00029(8) | 0.72400(8) | 0.5192(2)   | 0.0201(3)    | 1.0   |
| Se4  | 8g      | 0.43882(8) | 0.05223(8) | 0.7417(2)   | 0.0188(3)    | 1.0   |
| Se5  | 8g      | 0.23988(8) | 0.18306(8) | 0.99952(19) | 0.0155(3)    | 1.0   |

\* $U_{(eq)}$  is defined as one-third of the trace of the orthogonalized  $U_{ij}$  tensor.

**Table S3.** Selected bond lengths (Å) for Cs<sub>2</sub>CdAsSe<sub>5</sub>.

|        |            |         |            |         |            |
|--------|------------|---------|------------|---------|------------|
| As–Se1 | 2.2846(17) | Cs1–Se1 | 3.683(2)   | Cs2–Se1 | 3.6360(16) |
| As–Se2 | 2.3315(17) | Cs1–Se1 | 3.885(2)   | Cs2–Se2 | 3.6849(15) |
| As–Se3 | 2.2879(18) | Cs1–Se1 | 3.9469(18) | Cs2–Se2 | 3.7906(15) |
| As–Se4 | 2.3426(17) | Cs1–Se1 | 4.1325(17) | Cs2–Se3 | 3.7109(15) |
| Cd–Se2 | 2.6852(16) | Cs1–Se2 | 4.2670(17) | Cs2–Se3 | 3.7592(15) |
| Cd–Se4 | 2.6475(15) | Cs1–Se2 | 3.7913(18) | Cs2–Se4 | 3.8065(16) |
| Cd–Se5 | 2.6726(15) | Cs1–Se3 | 3.8700(17) | Cs2–Se4 | 3.9154(16) |
| Cd–Se5 | 2.6975(15) | Cs1–Se3 | 3.6209(16) | Cs2–Se5 | 3.8008(14) |
|        |            | Cs1–Se4 | 3.7962(17) | Cs2–Se5 | 3.8110(14) |

***Electronic Supplementary Information (ESI)***

**Table S4.** Structural features of selected chalcogenides in the X–M–As<sup>V</sup>–Q (X = charge-balanced cations; M = metal elements; Q = chalcogen) system.

| Structure type | Compounds                                                                        | Crystal system | Space group                      | Structural dimension | Ref.      |
|----------------|----------------------------------------------------------------------------------|----------------|----------------------------------|----------------------|-----------|
|                | SrAgAsS <sub>4</sub>                                                             | orthorhombic   | <i>Ama2</i> (no. 40)             | 2D                   | 10        |
| 1–1–1–4        | NaEuAsS <sub>4</sub>                                                             | orthorhombic   | <i>Ama2</i> (no. 40)             | 3D                   | 11        |
|                | KEuAsS <sub>4</sub>                                                              | monoclinic     | <i>P2<sub>1</sub>/m</i> (no.11)  | 2D                   | 12        |
|                | KAg <sub>2</sub> AsS <sub>4</sub>                                                | tetragonal     | <i>I-42m</i> (no.121)            | 3D                   | 13        |
| 1–2–1–4        | RbAg <sub>2</sub> AsS <sub>4</sub>                                               | triclinic      | <i>P</i> $\bar{1}$ (no.2)        | 1D                   | 14        |
|                | (NH <sub>4</sub> )Ag <sub>2</sub> AsS <sub>4</sub>                               | tetragonal     | <i>I</i> $\bar{4}2m$ (no.121)    | 3D                   | 15        |
| 2–1–1–4        | Cs <sub>2</sub> AgAsS <sub>4</sub>                                               | triclinic      | <i>P</i> $\bar{1}$ (no.2)        | 1D                   | 16        |
|                | K <sub>2</sub> AuAsS <sub>4</sub>                                                | monoclinic     | <i>P2<sub>1</sub>/m</i> (no.11)  | 1D                   | 17        |
| 2–1–1–5        | Cs <sub>2</sub> CdAsS <sub>5</sub>                                               | tetragonal     | <i>P4<sub>2</sub>/n</i> (no. 86) | 0D                   | This work |
|                | Cs <sub>3</sub> BiAs <sub>2</sub> S <sub>8</sub>                                 | monoclinic     | <i>P2<sub>1</sub>/m</i> (no.11)  | 1D                   | 18        |
|                | K <sub>3</sub> SmAs <sub>2</sub> S <sub>8</sub>                                  | monoclinic     | <i>C2/c</i> (no.15)              | 1D                   | 19        |
| 3–1–2–8        | K <sub>3</sub> GdAs <sub>2</sub> S <sub>8</sub>                                  | monoclinic     | <i>C2/c</i> (no.15)              | 1D                   | 19        |
|                | K <sub>3</sub> TbAs <sub>2</sub> S <sub>8</sub>                                  | monoclinic     | <i>C2/c</i> (no.15)              | 1D                   | 19        |
|                | K <sub>3</sub> DyAs <sub>2</sub> S <sub>8</sub>                                  | monoclinic     | <i>C2/c</i> (no.15)              | 1D                   | 12        |
|                | K <sub>4</sub> MnAs <sub>2</sub> S <sub>8</sub>                                  | monoclinic     | <i>P2/c</i> (no.13)              | 0D                   | 20        |
| 4–1–2–8        | Rb <sub>4</sub> MnAs <sub>2</sub> S <sub>8</sub>                                 | triclinic      | <i>P</i> $\bar{1}$ (no.2)        | 0D                   | 20        |
|                | Cs <sub>4</sub> MnAs <sub>2</sub> S <sub>8</sub>                                 | triclinic      | <i>P</i> $\bar{1}$ (no.2)        | 0D                   | 20        |
| 4–1–2–9        | Rb <sub>4</sub> CdAs <sub>2</sub> S <sub>9</sub>                                 | triclinic      | <i>P</i> $\bar{1}$ (no.2)        | 0D                   | 20        |
| 4–1–2–10       | Ba <sub>4</sub> HgAs <sub>2</sub> S <sub>10</sub>                                | monoclinic     | <i>C2/c</i> (no.15)              | 0D                   | 21        |
| 5–16–7–28      | (NH <sub>4</sub> ) <sub>5</sub> Ag <sub>16</sub> As <sub>7</sub> S <sub>28</sub> | monoclinic     | <i>C/c</i> (no. 9)               | 3D                   | 22        |
|                | Rb <sub>7</sub> Cu <sub>4</sub> As <sub>3</sub> S <sub>13</sub>                  | trigonal       | <i>P31c</i> (no.159)             | 0D                   | 23        |
| 7–4–3–13       | Cs <sub>7</sub> Cu <sub>4</sub> As <sub>3</sub> S <sub>13</sub>                  | trigonal       | <i>P</i> $\bar{3}$ (no.147)      | 0D                   | 23        |



#### 4. References

- [1] G. Kortüm, *Reflectance Spectroscopy*; Springer-Verlag: New York, 1969.
- [2] Sheldrick, G. M. A short history of SHELX, *Acta Crystallogr., Sect. A: Found. Crystallogr.*, 2008, 112–122.
- [3] A. L. Spek, Single-crystal structure validation with the program PLATON, *J. Appl. Cryst.*, 2003, **36**, 7–13.
- [4] L. M. Gelato and E. J. Parthe, STRUCTURE TIDY—a computer program to standardize crystal structure data, *Appl. Crystallogr.*, 1987, **20**, 139–143.
- [5] G. Kresse, VASP, 5.3.5; <http://cms.mpi.univie.ac.at/vasp/vasp/vasp.html>.
- [6] G. Kresse and J. Furthmüller, Efficient iterative schemes for ab initio total-energy calculations using a plane-wave basis set, *Phys. Rev. B: Condens. Matter*, 1996, **54**, 11169–11186.
- [7] G. Kresse and D. Joubert, From ultrasoft pseudopotentials to the projector augmented-wave method, *Phys. Rev. B: Condens. Matter*, 1999, **59**, 1758–1775.
- [8] J. P. Perdew, K. Burke and M. Ernzerhof, Generalized gradient approximation made simple, *Phys. Rev. Lett.*, 1996, **77**, 3865–3868.
- [9] P. E. Blochl, Projector augmented-wave method, *Phys. Rev. B: Condens. Matter*, 1994, **50**, 17953–17979.
- [10] J. Tang, F. Liang, C. Tang, W. Xing, J. Wu, W. Yin, B. Kang and J. Deng, *Inorg. Chem.*, 2022, **61**, 9205–9212.
- [11] T. K. Bera and M. G. Kanatzidis, *Inorg. Chem.*, 2012, **51**, 4293–4299.

- [12] Y. D. Wu and W. Bensch, *Solid State Sci.*, 2009, **11**, 1542–1548.
- [13] G. L. Schimek and J. W. Kolis, *Acta Crystallogr., Sect. C: Cryst. Struct. Commun.*, 1997, **53**, 991–992.
- [14] Y. Li, X. Song, Y. Zhong, Y. Guo, M. Ji, Z. You and Y. An, *J. Alloys Compd.*, 2021, **872**, 159591.
- [15] M. Auernhammer, H. Effenberger, E. M. Irran, F. Pertlik and J. Rosenstingl, *J. Solid State Chem.*, 1993, **106**, 421–426.
- [16] P. T. Wood, G. L. Schimek and J. W. Kolis, *Chem. Mater.*, 1996, **8**, 721–726.
- [17] S. Loeken and W. Tremel, *Eur. J. Inorg. Chem.*, 1998, **1998**, 283–289.
- [18] T. K. Bera, R. G. Iyer, C. D. Malliakas and M. G. Kanatzidis, *Inorg. Chem.*, 2013, **52**, 11370–11376.
- [19] Y. Wu, C. Naether and W. Bensch, *Inorg. Chem.*, 2006, **45**, 8835–8837.
- [20] P. N. Iyer and M.G. Kanatzidis, *Inorg. Chem.*, 2004, **43**, 3656–3662.
- [21] W. Xing, N. Wang, Z. Li, W. Liu, J. Tang, W. Yin, Z. Lin, B. Kang and J. Yao *Dalton Trans.*, 2020, **49**, 13060–13065.
- [22] F. Pertlik, *Monatsh. Chem.*, 1994, **125**, 1311–1319.
- [23] Y. Li, X. Cao, M. Ji, Z. You and Y. An, *Inorg. Chem. Commun.*, 2022, **139**, 109365.
